# Supplementary material for: Catalysis-dependent condensation of citrate synthase involved in glutamate overproduction in Corynebacterium glutamicum
Source: Research Square preprint supplement (doi:10.21203/rs.3.rs-6691977/v1), 2025-05-28
Supplement: Supplementary file 1 [file 43178d174d92ca246c4d76ef.pdf]

1    **Supplementary Information**

2    **Catalysis-dependent condensation of citrate synthase involved in glutamate**  
3    **overproduction in *Corynebacterium glutamicum***

4    Makoto Nagaoka<sup>1</sup>, Junko Yamamoto<sup>1</sup>, Makoto Nishiyama<sup>1,2</sup>, and Saori Kosono<sup>\*1,2,3</sup>

5    <sup>1</sup>Graduated School of Agriculture and Life Sciences, The University of Tokyo, Tokyo,  
6    Japan; <sup>2</sup>Collaboration Research Institute for Innovative Microbiology, The University of  
7    Tokyo, Tokyo, Japan; <sup>3</sup>RIKEN Center for Sustainable Resource Science, Saitama, Japan.

8

9

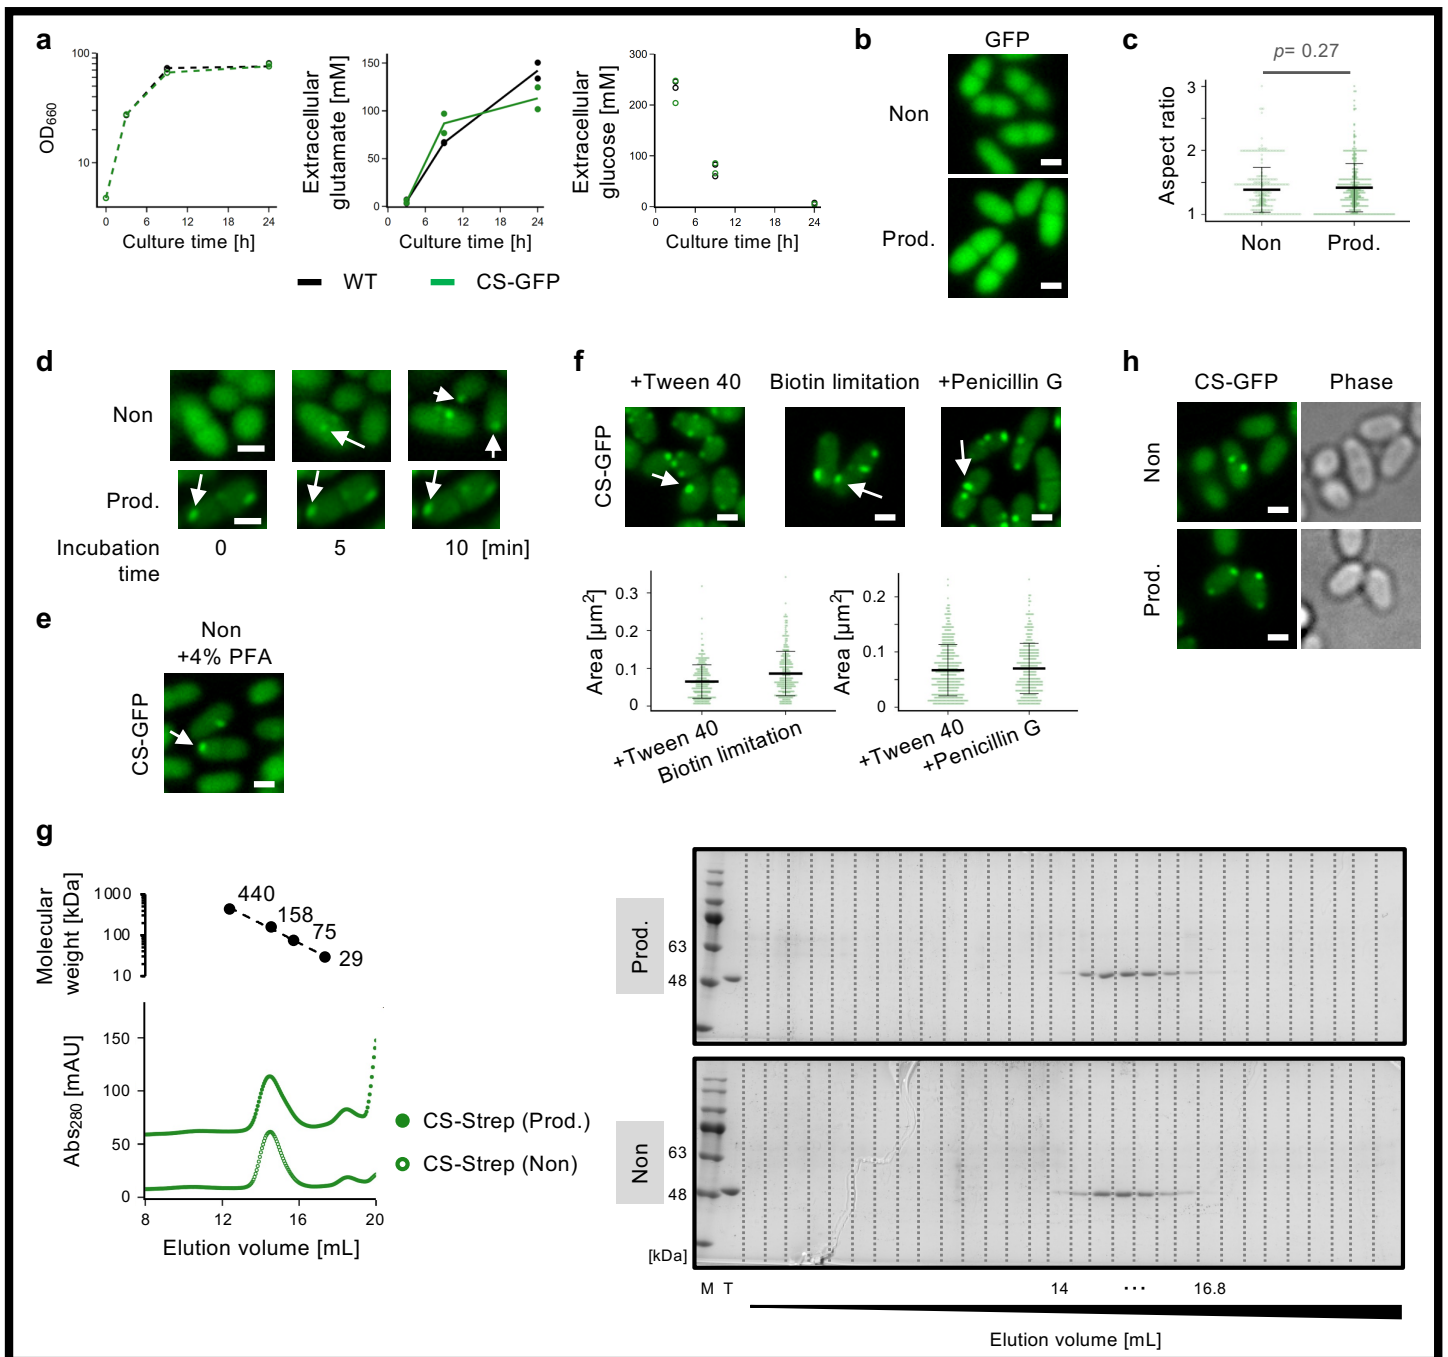

**Supplementary Fig. S1 Citrate synthase formed condensates in *Corynebacterium glutamicum* cells**

**a** Growth, extracellular glutamate production, and extracellular glucose consumption of the wild-type (13032) and CgCS-GFP (NMa43) strains. Two independent culture experiments were conducted. **b** Images of mEGFP expression in *C. glutamicum*. The NMa42 strain was used as a control. **c** Aspect ratios of CS condensates. The same datasets were used as shown in Figure 1d. **d** Time-lapse images of CgCS-GFP. **e** CgCS-GFP images of fixed cells using 4% (w/v) paraformaldehyde. We added 4% (w/v) paraformaldehyde to the cultures in non-producing conditions after 9 h and rotated at 31.5 °C for 20 min before microscopy. **f** CgCS-GFP images in *C. glutamicum* cells under glutamate-producing conditions induced by different triggers (after 9 h). **g** Size-exclusion chromatography analysis was performed using CgCS-Strep purified from *C. glutamicum* cells under glutamate-producing (Prod.) and non-producing (Non) conditions. Chromatography was performed using a Superdex 200 Increase 10/300 GL column (GE Healthcare) with buffer D at a flow rate of 0.75 mL/min, and 0.4 mL fractions were collected. The calculated molecular weights compared with the standards were 133 and 129 kDa, respectively, suggesting that they exist as dimers (50.1 kDa for monomers). **h** GFP fluorescence and bright-field images of the CS-GFP producing strain (NMa43). At least two experiments were repeated independently for **b–h**, and a representative dataset is shown.

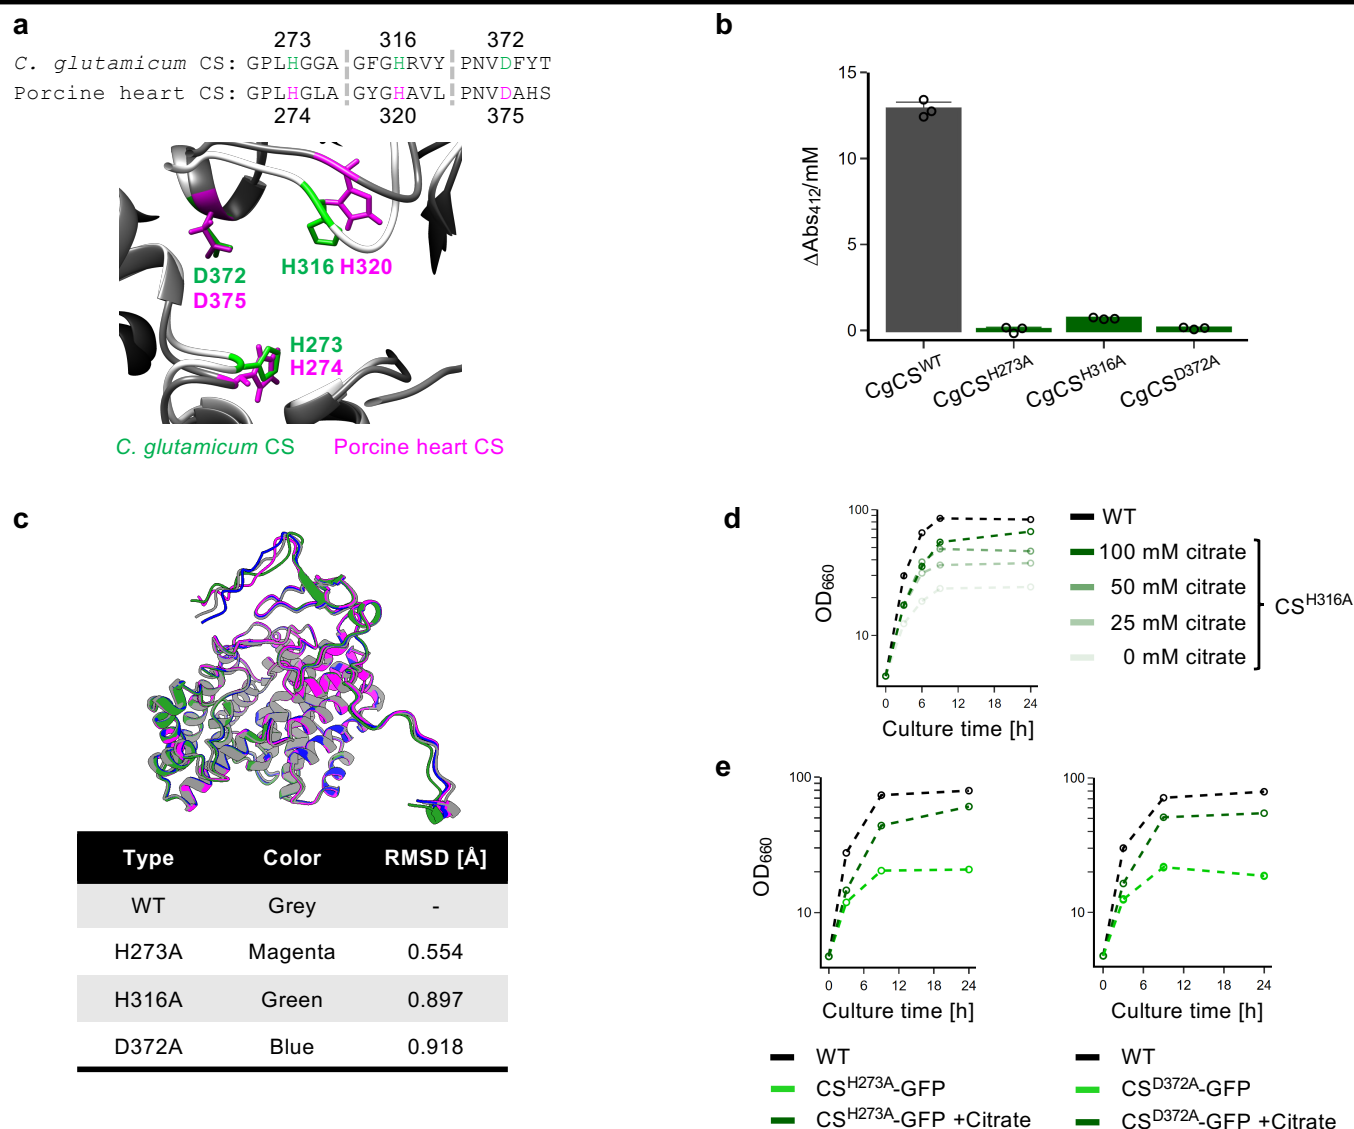

**Supplementary Fig. S2 Active CS was required for condensation**

**a** Amino acid sequence and structural alignments of *Corynebacterium glutamicum* and porcine heart CS. Structures of CgCS available in the AlphaFold Protein Structure Database (AF-P42457-F1-v4) and porcine heart CS (PDB ID: 3ENJ) were used, and structural alignment was performed using UCSF Chimera software (ver. 1.19). **b** CS activity of recombinant CgCS<sup>WT</sup>-Strep, CgCS<sup>H273A</sup>-Strep, CgCS<sup>H316A</sup>-Strep, and CgCS<sup>D372A</sup>-Strep proteins. Data from three replicate assays are presented. **c** AlphaFold modeling of CgCS<sup>WT</sup>, CgCS<sup>H273A</sup>, CgCS<sup>H316A</sup>, and CgCS<sup>D372A</sup> structures. The root mean square deviation (RMSD) values between CgCS<sup>WT</sup> and variants are shown. **d** Dose-dependent restoration of the growth of CS<sup>H316A</sup> strain (NMa191) by citrate. WT, ATCC 13032 strain. **e** Restoration of the growth of CgCS<sup>H273A</sup>-GFP (NMa183) and CgCS<sup>D372A</sup>-GFP (NMa381) strains with 100 mM citrate. Cells were cultured in a biotin-30 glutamate production medium without Tween 40 inducer; a representative data set of three biologically independent experiments is shown (**d** and **e**).

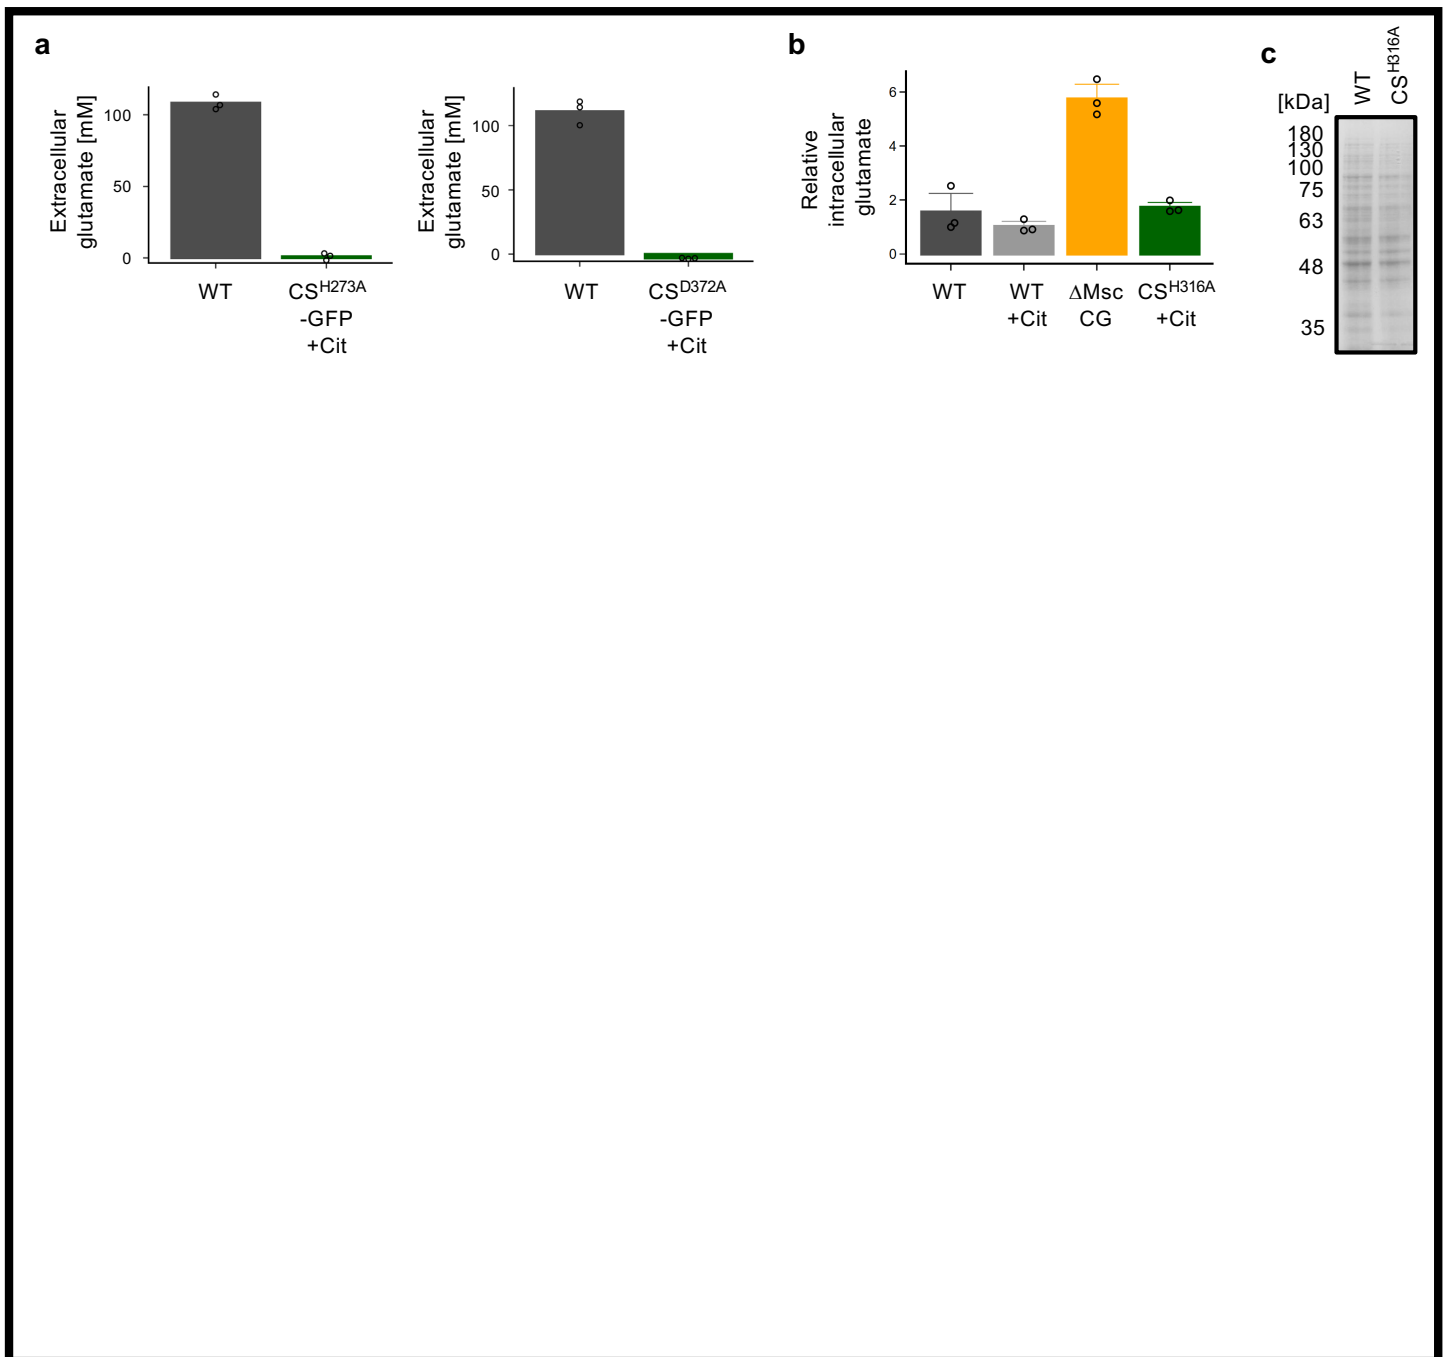

**Supplementary Fig. S3 CS condensation and its relationship with glutamate production**

**a** Extracellular glutamate production (after 24 h) of *CgCS<sup>H273A</sup>-GFP* (NMa183) and *CgCS<sup>D372A</sup>-GFP* (NMa381) strains under citrate (100 mM)-added glutamate-producing conditions. The WT and mutant strains were grown under normal glutamate-producing conditions. Three independent culture experiments were performed. **b** Intracellular glutamate levels in cells grown under glutamate-producing conditions (after 9 h). WT (ATCC 13032) with and without 100 mM citrate,  $\Delta$ MscCG (NM80) and *CgCS<sup>H316A</sup>* (NMa191) with 100 mM citrate. Data from three biologically independent experiments are shown. **c** CBB staining of *Corynebacterium glutamicum* cell lysates (5  $\mu$ g) used for the GDH and GOGAT activity assays (loading control of Fig. 3c).

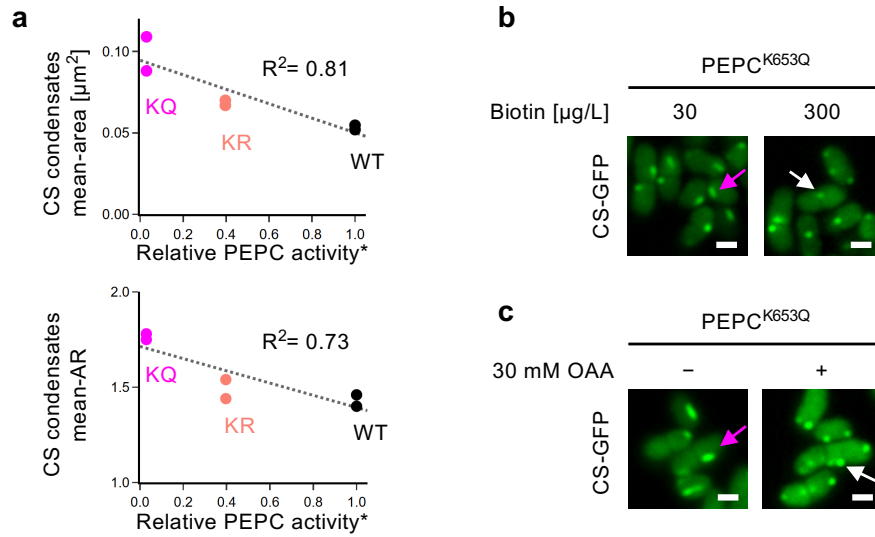

**Supplementary Fig. S4 Oxaloacetate was a factor affecting CS condensation**

**a** Correlation between size and aspect ratio of CgCS condensates and PEPC activity. PEPC activity data were obtained from our previous study<sup>23</sup> and are shown relative to WT activity. Circles represent the average value of >400 analyzed condensates, and data from two biologically independent experiments are plotted. Linear regression analysis was performed using R software. **b** CgCS-GFP in the PEPC<sup>K653Q</sup> strain (NMa190) under normal (30  $\mu\text{g/L}$ ) and excess (300  $\mu\text{g/L}$ ) biotin-supplemented glutamate-producing conditions. **c** CgCS-GFP in PEPC<sup>K653Q</sup> cells (NMa190) after dilution in buffer containing 30 mM oxaloacetate (OAA). At least two experiments were repeated independently for **b** and **c**, and a representative dataset is shown.

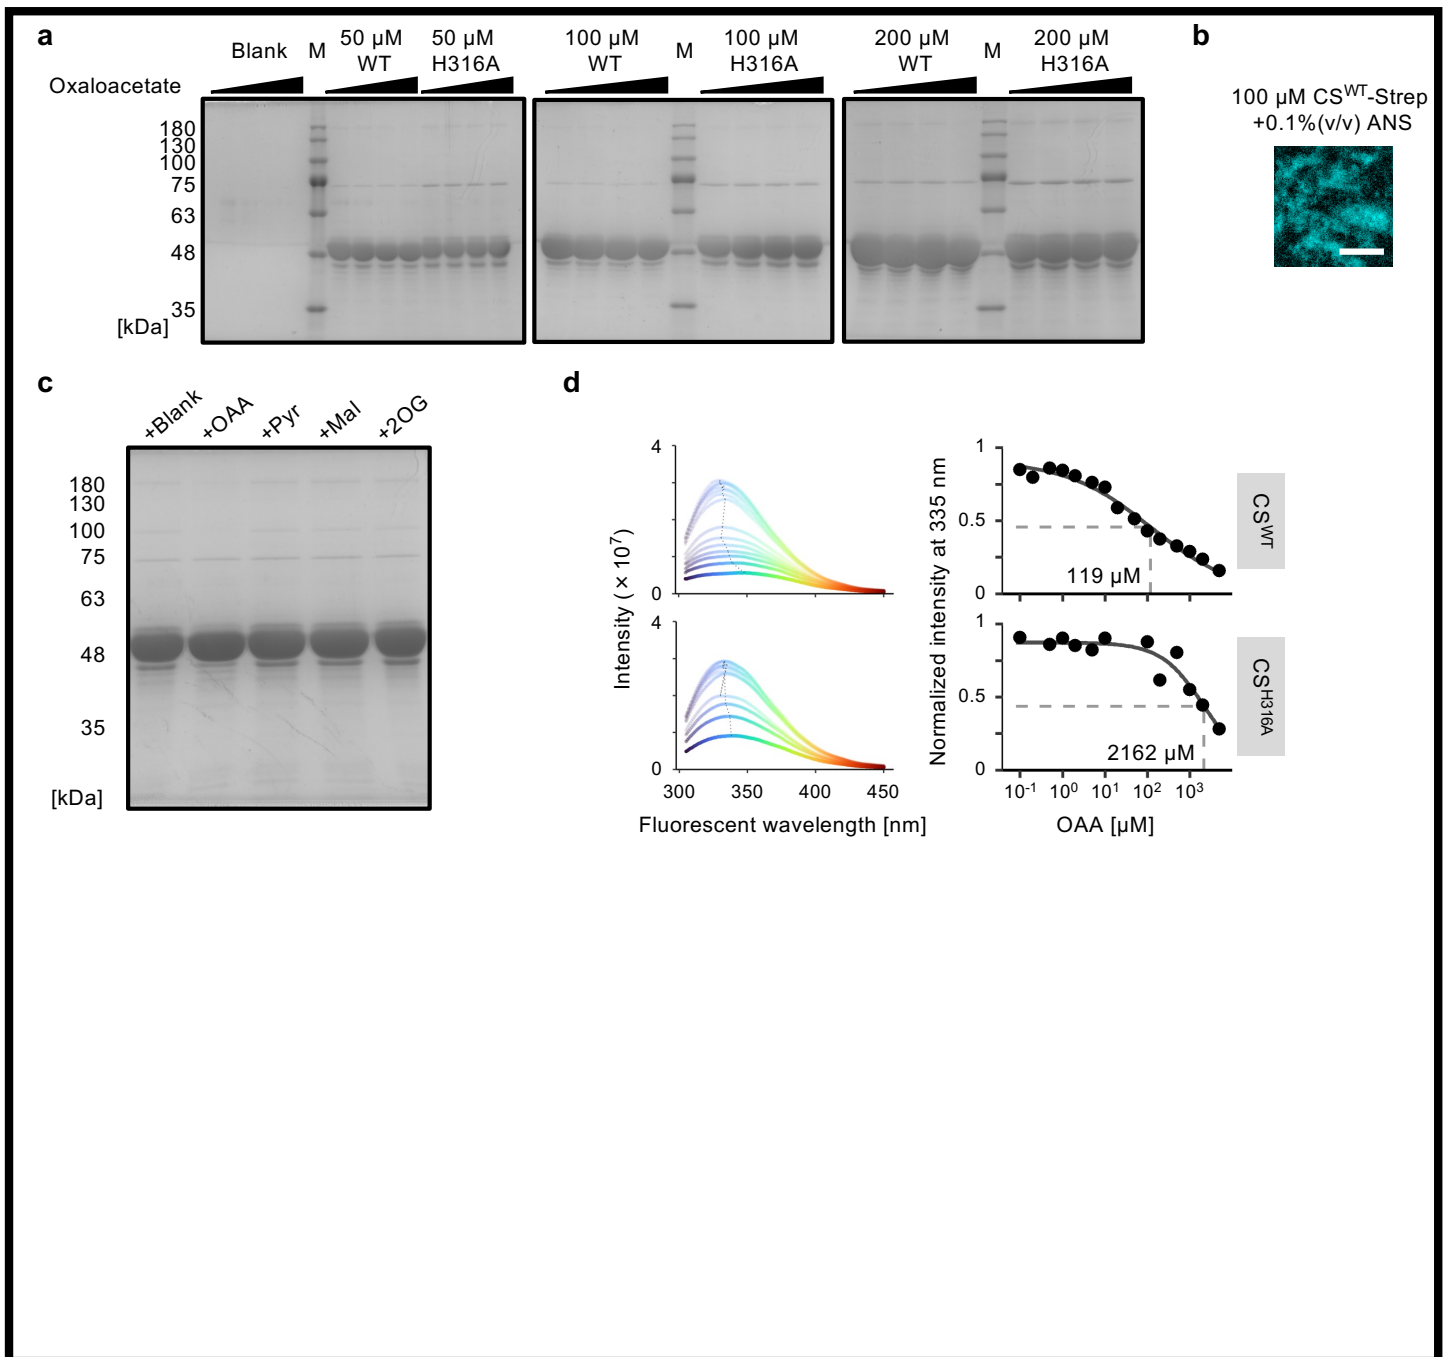

**Supplementary Fig. S5 Substrate-assisted conformational change was important for CgCS condensation**

**a** Loading control for recombinant CgCS<sup>WT</sup>-Strep and CgCS<sup>H316A</sup>-Strep used for the turbidity assays (Fig. 5a). Proteins (50, 100, and 200  $\mu$ M) were incubated with 0, 0.01, 0.1, or 1 mM oxaloacetate. M, molecular size markers. **b** 8-Anilino-1-naphthalenesulfonic acid (ANS) staining of CS<sup>WT</sup>-Strep protein after 24-h of incubation in a turbidity assay. CgCS<sup>WT</sup>-Strep (100  $\mu$ M) was incubated with 10  $\mu$ M ANS. Scale bars, 20  $\mu$ m. **c** Loading control of the CgCS<sup>WT</sup>-Strep protein used for turbidity assays (Fig. 5b). **d** Intrinsic fluorescence spectra of CS<sup>WT</sup>-Strep and CS<sup>H316A</sup>-Strep proteins in the presence of various concentrations (0–5 mM) of oxaloacetate (OAA). A part of the data (between 305 and 360 nm fluorescence wavelength) are shown in Fig. 5c. Dotted line indicates the peak positions of fluorescence (left). Fluorescence intensity plot at 335 nm of CS<sup>WT</sup>-Strep and CS<sup>H316A</sup>-Strep proteins in the presence of various concentrations (0.0001–5 mM) of OAA. The intensity was normalized to that without OAA. Fitting with a logistic function was performed using R software (right). All experiments were repeated independently at least twice, and a representative dataset is shown.

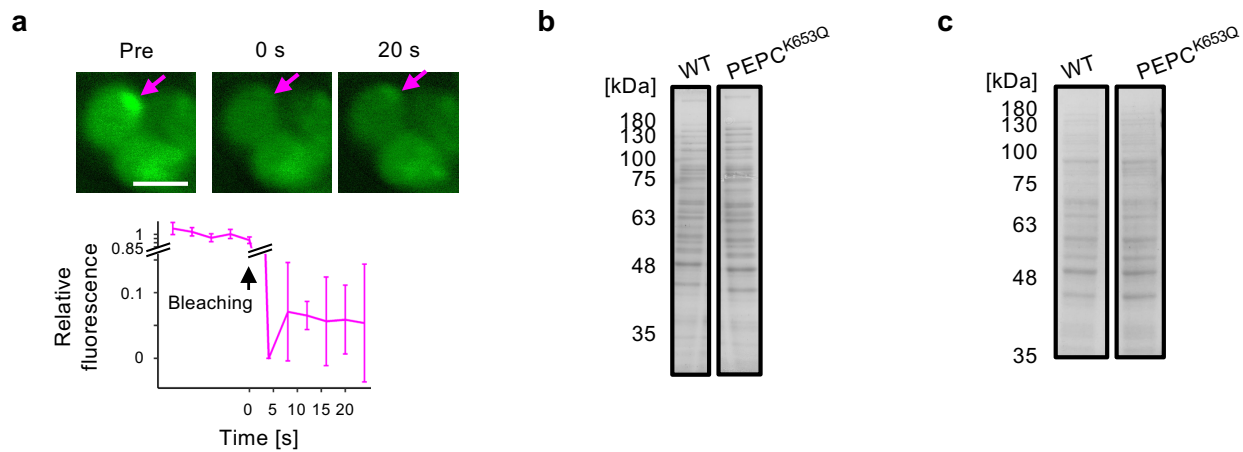

**Supplementary Fig. S6 Metabolic impact of abnormal CgCS condensation**

**a** FRAP analysis of CgCS condensates in PEPC<sup>K653Q</sup> strain (NMa190). Bleaching was performed using seven independent condensates, and a representative set is shown. **b** CBB staining of cell lysates (2 μg protein) used for the CS activity assay (loading control of Fig. 6b). **c** CBB staining of cell lysates (5 μg protein) used for GDH and GOGAT activity assays (loading control of Fig. 6c).

**Table S1 Strain list**

| Strain name | Description                                              | Source     |
|-------------|----------------------------------------------------------|------------|
| ATCC 13032  | <i>Corynebacterium glutamicum</i> wild-type strain       | JCM 1318   |
| NMa43       | CS-mEGFP                                                 | This study |
| NMa42       | ATCC 13032 harboring pECt::mEGFP (pNMa60)                | This study |
| YF1         | CS-Strep                                                 | This study |
| NMa358      | CS-GFP-FUS <sup>N</sup>                                  | This study |
| NMa191      | CS(H316A)                                                | This study |
| NMa94       | CS(H316A)-GFP                                            | This study |
| NMa183      | CS(H273A)-GFP                                            | This study |
| NMa381      | CS(D372A)-GFP                                            | This study |
| NMa260      | NMa42 harboring pECt::CS <sup>WT</sup> -mCherry (pNMa62) | This study |
| NMa263      | NMa42 harboring pECt::CS(H316A)-mCherry (pNMa63)         | This study |
| NM80        | $\Delta$ MscCG ( <i>cgl1270</i> -deleted)                | This study |
| MY100       | $\Delta$ PEPC ( <i>cgl1585</i> -deleted)                 | [23]       |
| MY40        | PEPC(K653Q)                                              | [23]       |
| MY38        | PEPC(K653R)                                              | [23]       |
| NMa240      | $\Delta$ PEPC ( <i>cgl1585</i> -deleted), CS-GFP         | This study |
| NMa190      | PEPC(K653Q), CS-GFP                                      | This study |
| NMa211      | PEPC(K653R), CS-GFP                                      | This study |

**Table S2. Plasmid list**

| Plasmid name | Description                        | Use                                                        |
|--------------|------------------------------------|------------------------------------------------------------|
| pNMa60       | pECt::mEGFP                        | Expression of mEGFP in <i>C. glutamicum</i>                |
| pNMa62       | pECt::CS <sup>WT</sup> -mCherry    | Expression of CS <sup>WT</sup> -mCherry                    |
| pNMa63       | pECt::CS <sup>H316A</sup> -mCherry | Expression of CS <sup>H316A</sup> -mCherry                 |
| pMK47        | pET21a::CS <sup>WT</sup> -Strep    | Expression of CS <sup>WT</sup> -Strep in <i>E. coli</i>    |
| pNMa68       | pET21a::CS <sup>H316A</sup> -Strep | Expression of CS <sup>H316A</sup> -Strep in <i>E. coli</i> |



15 **Table S3. Primer list**

| Primer         | Sequence (5'-3')                                                | For construction of              |
|----------------|-----------------------------------------------------------------|----------------------------------|
| <b>PNMa93</b>  | CCTCGCGAGGAGCGCGTGAGCAAGGGCGAG                                  | NMa43                            |
| <b>PNMa94</b>  | CTCGCCCTTGCTCACGCGCTCCTCGCGAGG                                  | NMa43                            |
| <b>PNMa95</b>  | CGAGCTGTACAAGTAAATTTAGCGGATGATTC                                | NMa43                            |
| <b>PNMa96</b>  | GAATCATCCGCTAAATTTACTTGTACAGCTCG                                | NMa43                            |
| <b>PYF382</b>  | TTCGAGCTCGGTACCCGGG                                             | YF1, NMa43                       |
| <b>PNMa114</b> | CTGCAGGTGCGACTCTAGAG                                            | YF1, NMa43                       |
| <b>PYF383</b>  | CGAACTGTGGGTGGGACCAACCAC                                        | YF1                              |
| <b>PYF384</b>  | TTGGTCCCACCCACAGTTCGAGAAG                                       | YF1                              |
| <b>PNMa101</b> | ACCACCATGGAATTCGAGCTCGGAAAGGAATAATTACTCTAATG<br>GTGAGCAAGGGCGAG | NMa42                            |
| <b>PNMa102</b> | GTCGACTCTAGAGGATCCCCGGTTACTTGTACAGCTCGTC                        | NMa42                            |
| <b>PNMa313</b> | GACGAGCTGTACAAGGCGGGTACCATGGATC                                 | NMa358                           |
| <b>PNMa314</b> | GATCCATGGTACCCGCCTTGTACAGCTCGTC                                 | NMa358                           |
| <b>PNMa315</b> | CAGGACCGTGGATAGATTTAGCGGATGATTC                                 | NMa358                           |
| <b>PNMa316</b> | GAATCATCCGCTAAATCTATCCACGGTCCTG                                 | NMa358                           |
| <b>PNMa115</b> | CTCATGGGCTTCGGAGCCCGCGTTTACAAGAAC                               | CS <sup>H316A</sup> substitution |
| <b>PNMa117</b> | GTTCTTGTAACGCGGGCTCCGAAGCCCATGAG                                | CS <sup>H316A</sup> substitution |
| <b>PNMa116</b> | CTCTACCCGAACGTAGCCTTCTACACCGGCCTG                               | CS <sup>D372A</sup> substitution |
| <b>PNMa118</b> | CAGGCCGGTGTAGAAGGCTACGTTCCGGGTAGAG                              | CS <sup>D372A</sup> substitution |
| <b>PNMa221</b> | CTGTCCGGCCCCACTGGCCGGTGGCGCAAACCAG                              | CS <sup>H273A</sup> substitution |
| <b>PNMa222</b> | CTGGTTTGCGCCACCGGCCAGTGGGCCGGACAG                               | CS <sup>H273A</sup> substitution |
| <b>PNMa172</b> | CGGGTACCGAGCTCGCTACTTGTACAGCTC                                  | pNM62 and 63                     |
| <b>PNMa126</b> | CCATGGAATTCGAGCTCGGAGTTTTTTTCCGAA                               | pNM62 and 63                     |
| <b>PNM282</b>  | ATATGCCCTGCAGGCACCTGTCATCCGCTCAG                                | NM80                             |

|               |                                                  |               |
|---------------|--------------------------------------------------|---------------|
| <b>PNM283</b> | CGTCTGTAATCAGCGTCGAGCCAAGATTAGCGC                | NM80          |
| <b>PNM284</b> | GCGCTAATCTTGGCTCGACGCTGATTACAGACG                | NM80          |
| <b>PNM285</b> | ATATGCCCTGCAGGCCTTGGACATCATCACGGAG               | NM80          |
| <b>PMK91</b>  | TTTAAGAAGGAGATATACATATGTTTGAAAGGGATATCGTG        | pMK47, pNMa68 |
| <b>PMK95</b>  | GGTGGTGGTGCTCGAGTGCTTATTACTTCTCGAACTGTGGGTG<br>G | pMK47, pNMa68 |

16

17

18

19

20
